# Supplementary material for: Verticillin A Overcomes Apoptosis Resistance in Human Colon Carcinoma through DNA Methylation-Dependent Upregulation of BNIP3
Source: Oxford University Press journal article supplement (doi:10.1158/0008-5472.can-11-1575), 2011-09-13
Supplement: 00085472can111575-sup-table_2_pdf_8k.pdf [file 00085472can111575-sup-table_2_pdf_8k.pdf]

**Supplemental Table 2. IC<sub>50</sub> of verticillin A for growth inhibition of multiple types of tumor cell lines**

| Cell Lines | Verticillin A (nM) |       |       |       | IC <sub>50</sub> (nM) |
|------------|--------------------|-------|-------|-------|-----------------------|
|            | 10                 | 100   | 1000  | 10000 |                       |
| Bcap-37    | 14.11              | 56.97 | 88.44 | 96.55 | 119                   |
| MCF-7      | 28.42              | 54.70 | 91.34 | 91.71 | 64                    |
| Hela       | 10.70              | 51.51 | 95.28 | 95.91 | 122                   |
| SMMC-7721  | 17.45              | 57.15 | 95.06 | 96.72 | 80                    |
| HepG2      | 29.3               | 55.08 | 92.34 | 93.15 | 62                    |
| SPC-A1     | 35.09              | 70.18 | 91.98 | 94.25 | 30                    |
| Jurkat     | 45.19              | 55.43 | 78.27 | 90.06 | 37                    |

Cells (1x10<sup>4</sup> cells/well) were incubated with various concentrations of verticillin A for 48 h and analyzed by the MTT assay. Number represents % growth inhibition as compared to untreated cells. IC<sub>50</sub> represents verticillin A concentration that causes 50% growth inhibition.
